# Supplementary material for: Dearomative cycloadditions of a silylene with pyrazine and quinoxaline
Source: Royal Society of Chemistry journal article supplement (doi:10.1039/c8dt02802h), 2018-01-01
Supplement: c8dt02802h1.pdf [file c8dt02802h1.pdf]

## Electronic Supplementary Information

### Dearomative Cycloadditions of a Silylene with Pyrazine and Quinoxaline

Shintaro Ishida,\* Tomofumi Tamura and Takeaki Iwamoto\*

Department of Chemistry, Graduate School of Science, Tohoku University, Aoba-ku, Sendai 980-8578, Japan.

E-mail: sishida@m.tohoku.ac.jp, iwamoto@m.tohoku.ac.jp

#### Contents

|                                                                       |    |
|-----------------------------------------------------------------------|----|
| 1. Experimental Details and Spectra                                   | 2  |
| 2. Single Crystal X-ray Diffraction Analyses of <b>2</b> and <b>3</b> | 7  |
| 3. Theoretical Calculation                                            | 8  |
| 4. References                                                         | 21 |

## 1. Experimental Details

### General Procedure

All reactions treating air-sensitive compounds were carried out under an inert atmosphere (N<sub>2</sub> or Ar) using a high-vacuum line and standard Schlenk techniques, or a glove box, as well as dry and oxygen-free solvents. NMR spectra were recorded on a Bruker Avance III 500 FT NMR spectrometer. The <sup>1</sup>H NMR chemical shifts were referenced to residual <sup>1</sup>H of the solvents; C<sub>6</sub>D<sub>6</sub> (<sup>1</sup>H δ 7.16).<sup>S1</sup> The <sup>13</sup>C and <sup>29</sup>Si NMR chemical shifts were relative to Me<sub>4</sub>Si in ppm (δ 0.00). Sampling of air-sensitive compounds was carried out using a VAC NEXUS 100027 type glove box. Mass spectra were recorded on a Bruker Daltonics SolariX 9.4T. UV-vis spectra were recorded on a JASCO V-660 spectrometer. Measurement of melting point was measured on a SRS OptiMelt MPA100. Elemental analysis was performed with a J-SCIENCE LAB JM-11 at Research and Analytical Center for Giant Molecules, Graduate School of Science, Tohoku University.

### Materials

Benzene and hexane were dried and deoxygenated with VAC-103991 type solvent purifiers. Benzene-*d*<sub>6</sub> (C<sub>6</sub>D<sub>6</sub>) was dried with molecular sieves (3A). Silylene **1** was prepared according to the published procedure.<sup>S2</sup> Pyrazine and quinoxaline were commercially available and used without further purification.

### Reaction of Silylene **1** with Pyrazine (Synthesis of **2**)

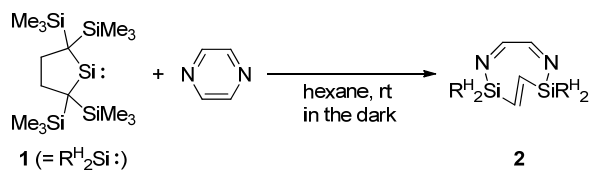

In a screw vial (2 mL) equipped with a magnetic stir bar, pyrazine (8.0 mg, 100 μmol) and silylene **1** (55 mg, 150 μmol) were placed. Then, hexane (1 mL) was added to the vial. After stirring for 5 minutes in the dark condition, the volatiles were removed under reduced pressure. The residue was subjected to alumina column chromatography (eluent: hexane containing 2 vol% of Et<sub>3</sub>N) and pure **2** was isolated in 50% yield (31 mg, 37 μmol).

**2**: purple crystals; mp. 158 °C (decomp.); <sup>1</sup>H NMR (500 MHz, C<sub>6</sub>D<sub>6</sub>, 297 K) δ 0.18 (s, 18H, SiMe<sub>3</sub>), 0.30 (s, 18H, SiMe<sub>3</sub>), 0.36 (s, 18H, SiMe<sub>3</sub>), 0.39 (s, 18H, SiMe<sub>3</sub>), 1.92–2.02 (m, 2H, CH<sub>2</sub>CH<sub>2</sub>), 2.02–2.09 (m, 2H, CH<sub>2</sub>CH<sub>2</sub>), 2.12–2.22 (m, 4H, CH<sub>2</sub>CH<sub>2</sub>), 8.54 (s, 2H, CH), 8.64 (s, 2H, CH); <sup>13</sup>C {<sup>1</sup>H} NMR (126 MHz, C<sub>6</sub>D<sub>6</sub>, 297 K) δ 3.5 (SiMe<sub>3</sub>), 4.38 (SiMe<sub>3</sub>), 4.43 (SiMe<sub>3</sub>), 4.5 (SiMe<sub>3</sub>), 11.3 (C) 11.8 (C), 33.0 (CH<sub>2</sub>), 35.6 (CH<sub>2</sub>), 169.3 (CH), 169.5 (CH); <sup>29</sup>Si {<sup>1</sup>H} NMR (99 MHz, C<sub>6</sub>D<sub>6</sub>, 297 K) δ 0.2 (Si), 2.2 (SiMe<sub>3</sub>), 2.9 (SiMe<sub>3</sub>), 3.0 (SiMe<sub>3</sub>), 3.7 (SiMe<sub>3</sub>); HRMS (APCI) Calcd for C<sub>36</sub>H<sub>84</sub>N<sub>2</sub>Si<sub>10</sub>: 824.43217 (M<sup>+</sup>); Found: 824.43216 (M<sup>+</sup>); Elem. Anal. Calcd for C<sub>36</sub>H<sub>84</sub>N<sub>2</sub>Si<sub>10</sub>: C, 52.35; H, 10.25; N, 3.39%. Found: C, 52.38; H, 10.23; N, 3.39%; UV-vis (hexane) λ<sub>max</sub>/nm (ε) 525 (59).

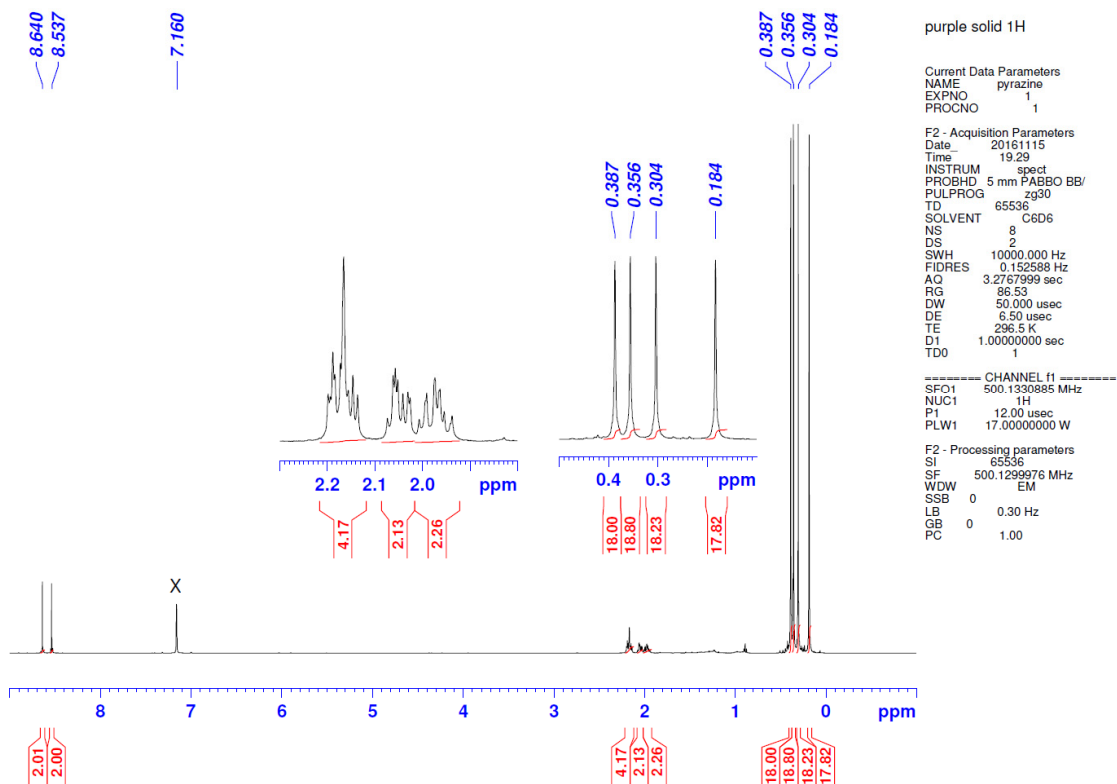

Fig. S1  $^1\text{H}$  NMR spectrum of **2** (in  $\text{C}_6\text{D}_6$ , 297 K). ( $\times = \text{C}_6\text{D}_5\text{H}$ ).

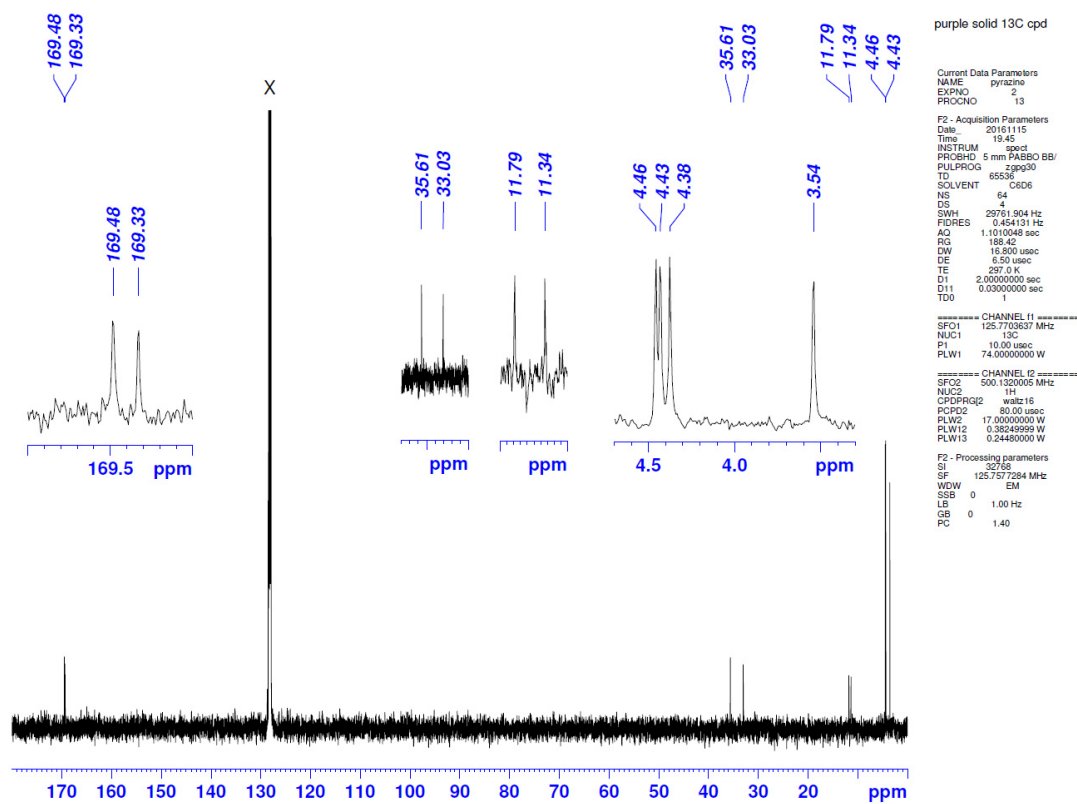

Fig. S2  $^{13}\text{C}\{^1\text{H}\}$  NMR spectrum of **2** (in  $\text{C}_6\text{D}_6$ , 297 K). ( $\times = \text{C}_6\text{D}_6$ ).

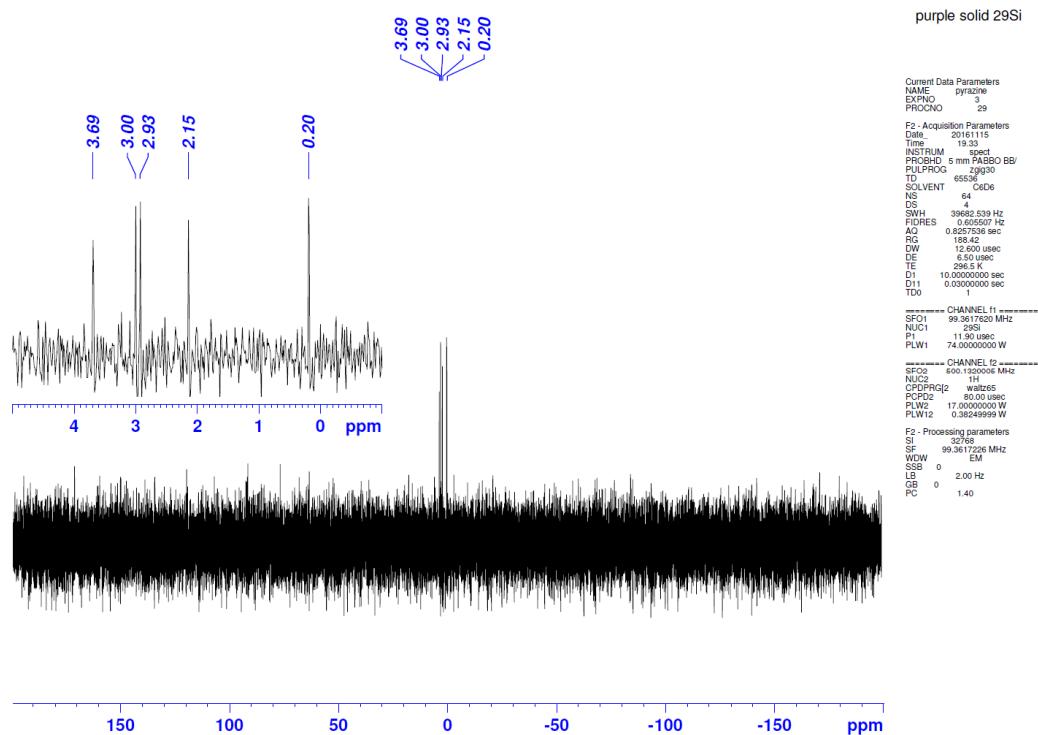

Fig. S3  $^{29}\text{Si}\{^1\text{H}\}$  NMR spectrum of **2** (in  $\text{C}_6\text{D}_6$ , 297 K).

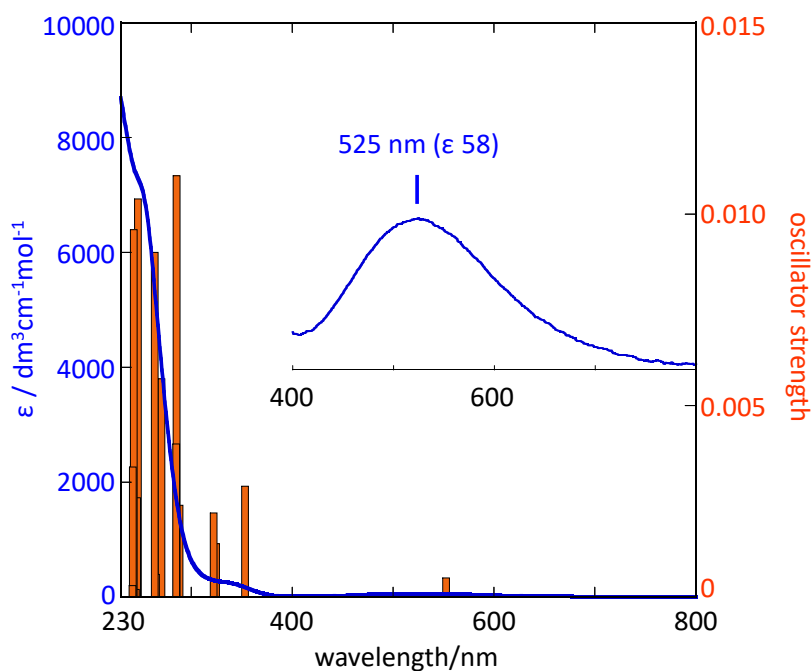

Fig. S4 UV-vis spectrum of **2** in hexane at room temperature. Superimposed vertical orange bars indicate band positions and oscillator strengths of  $\mathbf{2}_{\text{opt}}$  calculated at the TD-B3PW91/6-311+G(d,p)//B3PW91/6-31G(d) level of theory.

### Reaction of Silylene 1 with Quinoxaline (Synthesis of 3)

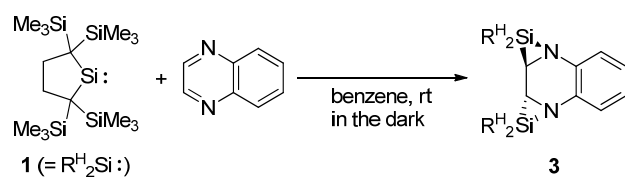

In a screw vial (2 mL) equipped with a magnetic stir bar, quinoxaline (7.0 mg, 54 μmol) and silylene **1** (38 mg, 100 μmol) were placed. Then, benzene (1.5 mL) was added to the vial. After stirring for 5 hours in the dark condition, the volatiles were removed under reduced pressure. Recrystallisation from hexane at -35 °C afforded pure **3** in 67% yield (30 mg, 34 μmol).

**3**: colorless crystals; mp. 231–233 °C; <sup>1</sup>H NMR (500 MHz, C<sub>6</sub>D<sub>6</sub>, 297 K) δ 0.10 (s, 18H, SiMe<sub>3</sub>), 0.345 (s, 18H, SiMe<sub>3</sub>), 0.354 (s, 18H, SiMe<sub>3</sub>), 0.40 (s, 18H, SiMe<sub>3</sub>), 1.82–1.90 (m, 2H, CH<sub>2</sub>CH<sub>2</sub>), 1.92–2.08 (m, 6H, CH<sub>2</sub>CH<sub>2</sub>), 2.77 (s, 2H, CH), 6.89–6.94 (AA'XX', 2H, CH), 7.16–7.20 (AA'XX', 2H, CH); <sup>13</sup>C {<sup>1</sup>H} NMR (126 MHz, C<sub>6</sub>D<sub>6</sub>, 298 K) δ 2.88 (SiMe<sub>3</sub>), 2.90 (SiMe<sub>3</sub>), 3.8 (SiMe<sub>3</sub>), 4.9 (SiMe<sub>3</sub>), 5.5 (C), 6.5 (C), 31.6 (CH<sub>2</sub>), 33.0 (CH<sub>2</sub>), 33.7 (CH), 119.2 (CH), 120.7 (CH), 132.4 (C); <sup>29</sup>Si {<sup>1</sup>H} NMR (99 MHz, C<sub>6</sub>D<sub>6</sub>, 297 K) δ -35.9 (Si), 3.0 (SiMe<sub>3</sub>), 3.6 (SiMe<sub>3</sub>), 3.8 (SiMe<sub>3</sub>), 4.0 (SiMe<sub>3</sub>); MS (EI, 70 eV) *m/z* (%) 874 (20, M<sup>+</sup>), 859 (3, M<sup>+</sup>-Me), 801 (7, M<sup>+</sup>-SiMe<sub>3</sub>), 502 (12, M<sup>+</sup>-1), 73 (100); Elem. Anal. Calcd for C<sub>40</sub>H<sub>86</sub>N<sub>2</sub>Si<sub>10</sub>: C, 54.85; H, 9.90; N, 3.20%. Found: C, 55.05; H, 9.95; N, 3.26%.

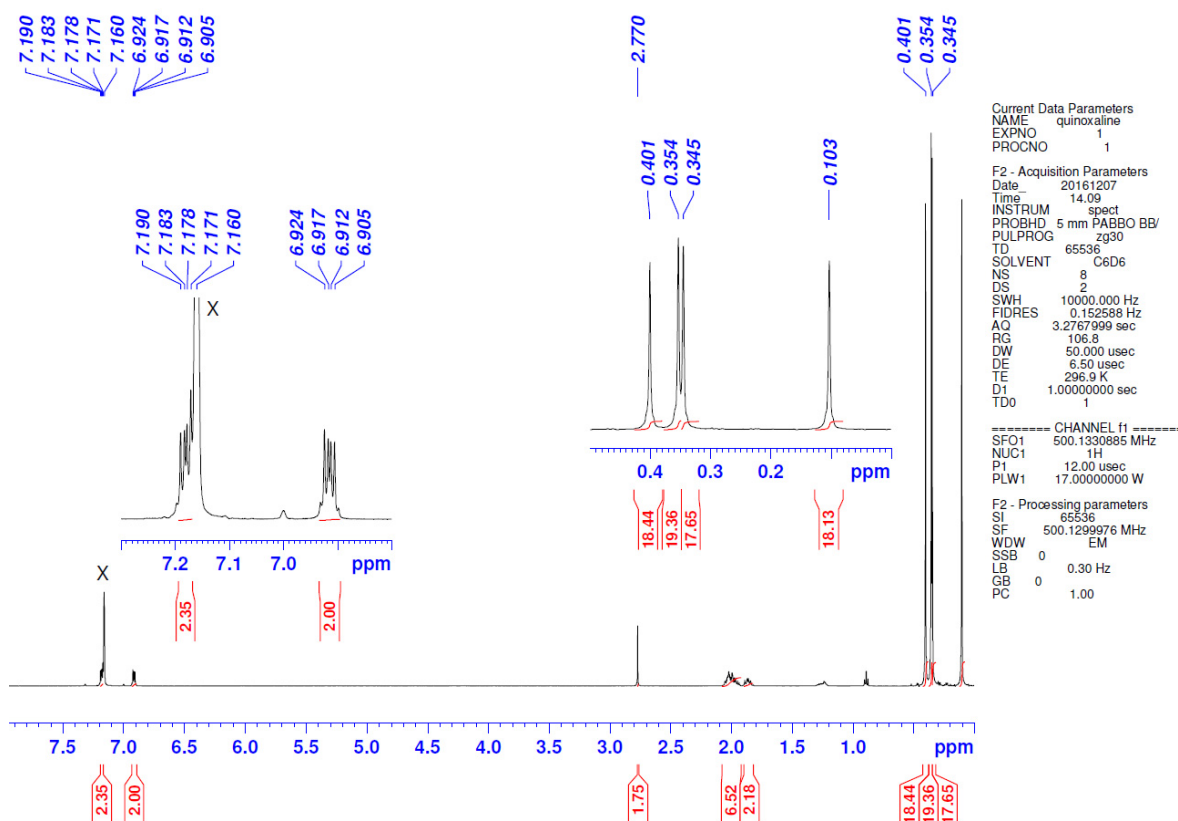

Fig. S5 <sup>1</sup>H NMR spectrum of **3** (in C<sub>6</sub>D<sub>6</sub>, 297 K). (× = C<sub>6</sub>D<sub>5</sub>H).

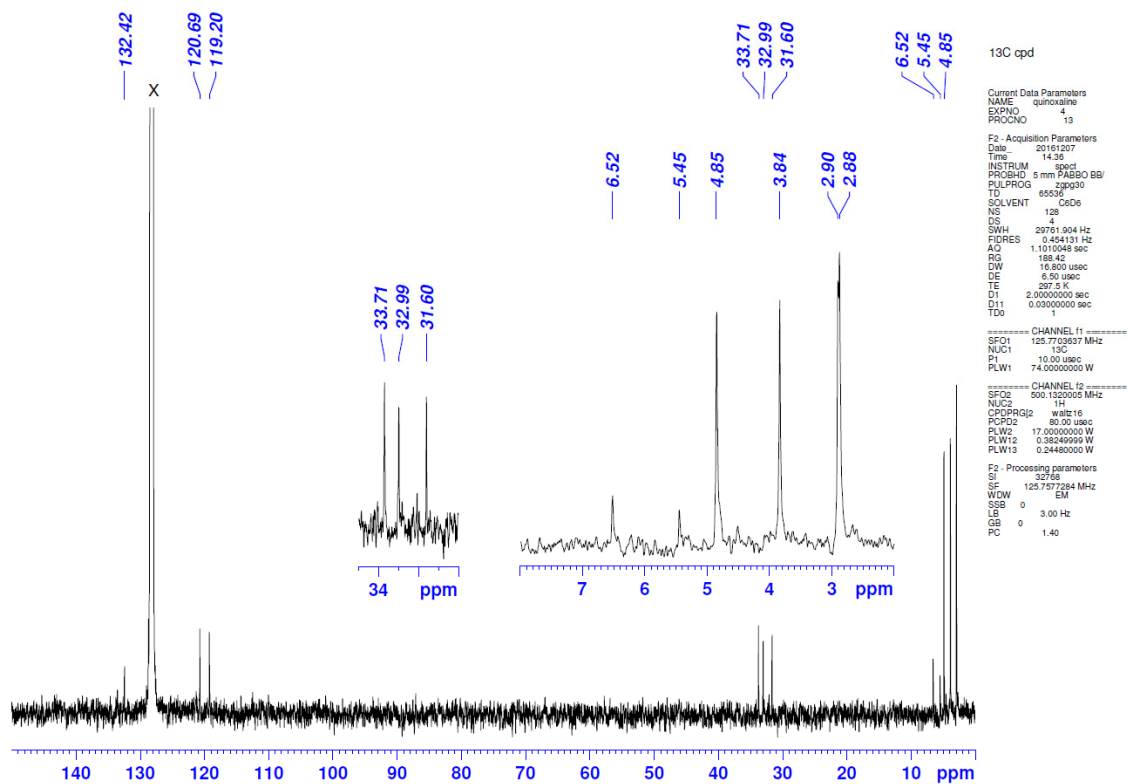

Fig. S6  $^{13}\text{C}\{^1\text{H}\}$  NMR spectrum of **3** (in  $\text{C}_6\text{D}_6$ , 298 K). ( $\times = \text{C}_6\text{D}_6$ ).

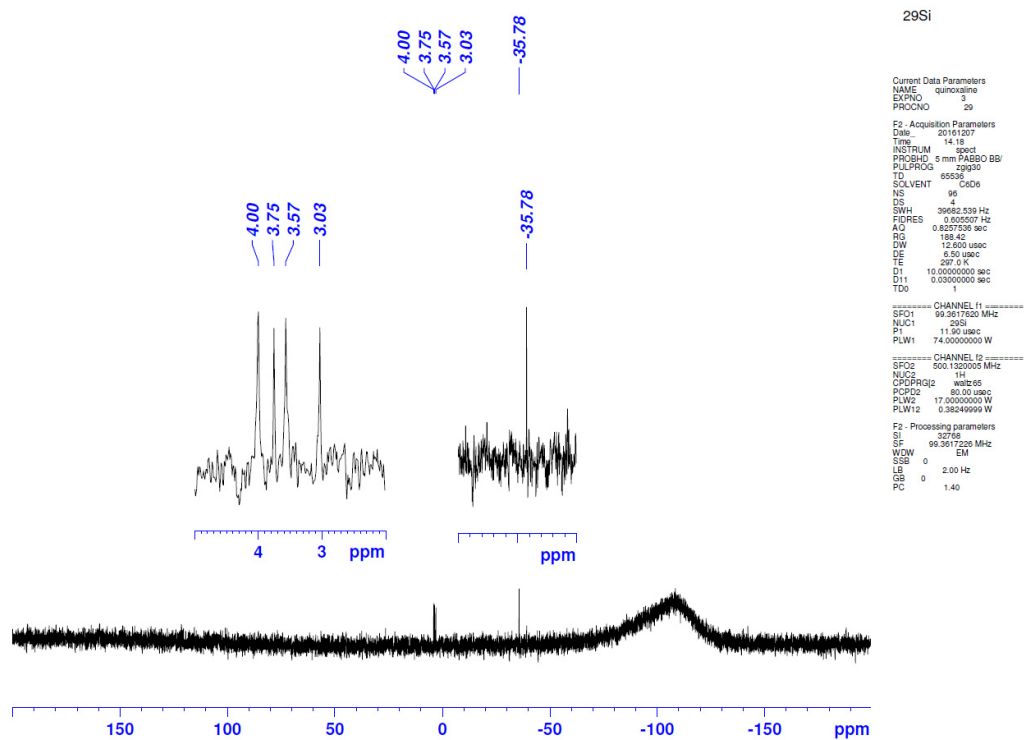

Fig. S7  $^{29}\text{Si}\{^1\text{H}\}$  NMR spectrum of **3** (in  $\text{C}_6\text{D}_6$ , 297 K).

## 2. Single Crystal X-ray Diffraction Analyses of 2 and 3

Single crystals suitable for X-ray diffraction study were obtained by recrystallisation from hexane at  $-35\text{ }^{\circ}\text{C}$  for **2** and from toluene at  $-35\text{ }^{\circ}\text{C}$  for **3**. The single crystals for data collection coated by Apiezon® grease was mounted on a glass fiber and then transferred to the cold nitrogen gas stream of the diffractometer. X-ray diffraction data were collected on a Bruker AXS APEX II CCD diffractometer with graphite monochromated Mo-K $\alpha$  radiation. An empirical absorption correction based on the multiple measurement of equivalent reflections was applied using the program SADABS<sup>S3</sup> and the structures were solved by direct methods and refined by full-matrix least squares against  $F^2$  using all data (SHELEX-2014).<sup>S4</sup> Molecular structures were analysed by Yadokari-XG<sup>S5</sup> software.

Crystal data for **2** (CCDC-1837160) (100 K): 0.10 mm  $\times$  0.10 mm  $\times$  0.10 mm; C<sub>36</sub>H<sub>84</sub>N<sub>2</sub>Si<sub>10</sub>; Formula weight 825.95; monoclinic; space group  $C2$ ;  $a = 21.0673(7)\text{ \AA}$ ,  $b = 9.5867(3)\text{ \AA}$ ,  $c = 16.1406(5)\text{ \AA}$ ,  $\beta = 129.5940(10)^{\circ}$ ,  $V = 2511.97(14)\text{ \AA}^3$ ,  $Z = 2$ ,  $D_{\text{calcd}} = 1.092\text{ Mg m}^{-3}$ , 7978 reflections measured, 4641 unique ( $R_{\text{int}} = 0.0213$ ), which were used in all calculations;  $R1 = 0.0346$  ( $I > 2\sigma(I)$ ),  $wR2 = 0.0851$  (all data), GOF = 1.061, max/min residual electron densities 0.563/ $-0.208\text{ e/\AA}^3$ .

Crystal data for **3** (CCDC-1837161) (100 K): 0.20 mm  $\times$  0.20 mm  $\times$  0.10 mm; C<sub>47</sub>H<sub>94</sub>N<sub>2</sub>Si<sub>10</sub>; Formula weight 968.14; triclinic; space group  $P-1$ ;  $a = 11.4668(3)\text{ \AA}$ ,  $b = 13.4537(4)\text{ \AA}$ ,  $c = 20.1191(6)\text{ \AA}$ ,  $\alpha = 77.1630(10)^{\circ}$ ,  $\beta = 84.5050(10)^{\circ}$ ,  $\gamma = 72.1030(10)^{\circ}$ ,  $V = 2878.52(14)\text{ \AA}^3$ ,  $Z = 2$ ,  $D_{\text{calcd}} = 1.117\text{ Mg m}^{-3}$ , 36402 reflections measured, 10714 unique ( $R_{\text{int}} = 0.0214$ ), which were used in all calculations;  $R1 = 0.0301$  ( $I > 2\sigma(I)$ ),  $wR2 = 0.0765$  (all data), GOF = 1.045, max/min residual electron densities 0.433/ $-0.226\text{ e/\AA}^3$ .

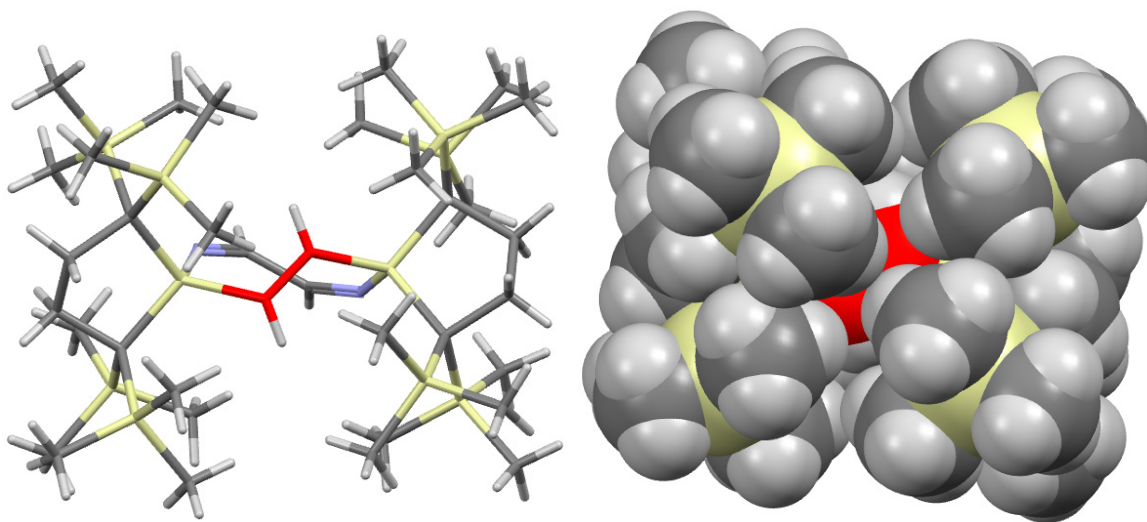

**Fig. S8** Stick model (left) and space-filling model (right) of structure of **2**. Carbon atoms in red colour indicate *trans*-alkene moiety.

### 3. Theoretical Calculation

All theoretical calculations were performed using Gaussian 09<sup>S6</sup> and GRRM 14<sup>S7</sup> programs. Geometry optimisation and frequency analysis were carried out at the B3PW91/6-31G(d) level of theory for all compounds. Each TS was checked by IRC analysis. Atomic coordinates of the optimised structures were listed in Tables S1-S13. No imaginary frequencies were found in the equilibrium structures of all compounds and one imaginary frequencies were found in the transition states (TS1, TS2, TS3, TS4). Twenty excited states of **2**<sub>opt</sub> and **2S**<sub>opt</sub> calculated at the TD-B3PW91/6-311+G(d,p) level of theory was summarised in Tables S14 and S15.

**Table S1.** Atomic Coordinates of **2**<sub>opt</sub>

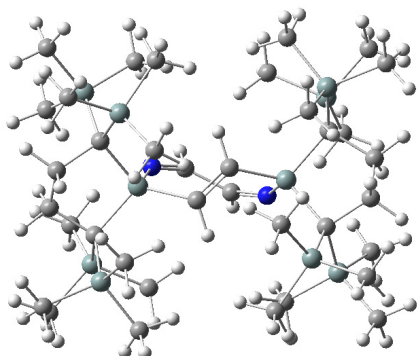

| Atomic Type | Coordinates (Angstroms) |                 |                |
|-------------|-------------------------|-----------------|----------------|
|             | X                       | Y               | Z              |
| Si          | 5.658887207367          | 4.974728080809  | 4.060006640315 |
| Si          | 8.104599454905          | 6.835310826350  | 2.993150702793 |
| Si          | 8.504470687401          | 3.730340764485  | 3.143293184973 |
| Si          | 3.050337616378          | 5.520508019652  | 2.280679705246 |
| Si          | 3.491975714705          | 2.576882152093  | 3.229004777000 |
| N           | 5.102691519292          | 6.603306665281  | 4.496222326468 |
| C           | 5.092551888874          | 7.356691672262  | 5.513818264143 |
| H           | 4.638331235568          | 8.361470179089  | 5.383357372445 |
| C           | 5.901836745427          | 4.243346785363  | 5.778801308984 |
| H           | 6.067262370221          | 4.268466145510  | 6.186722825009 |
| C           | 7.194703990860          | 5.133093219563  | 2.921240975342 |
| C           | 6.495065448109          | 4.983796700321  | 1.524745548443 |
| H           | 6.067262370221          | 5.944582601128  | 1.219489520751 |
| H           | 7.208437188239          | 4.705631788479  | 0.738243065269 |
| C           | 5.360608089430          | 3.950931157076  | 1.590906373879 |
| H           | 5.811045544424          | 2.951665234562  | 1.680246892446 |
| H           | 4.807030349666          | 3.939865935522  | 0.641505993207 |
| C           | 4.402504864968          | 4.232577183974  | 2.809446102581 |
| C           | 7.054705527275          | 8.274392277628  | 2.346482886139 |
| H           | 7.666897790957          | 9.184518325173  | 2.398022210185 |
| H           | 6.153180523377          | 8.439587589288  | 2.941479252915 |
| H           | 6.756509713673          | 8.147765149802  | 1.300247817563 |
| C           | 9.628608412144          | 6.8670733554880 | 1.857784316849 |
| H           | 9.361538367368          | 6.651958394057  | 0.816326568306 |
| H           | 10.426362628489         | 6.177760905623  | 2.149805272907 |
| H           | 10.049946548941         | 7.880599880271  | 1.878570008523 |
| C           | 8.676039432838          | 7.310320576652  | 4.740414552796 |
| H           | 8.695009679902          | 8.403830100077  | 4.827192285328 |
| H           | 9.685055110968          | 6.950133375753  | 4.962628339520 |
| H           | 8.015879316452          | 6.933439377637  | 5.527832291570 |
| C           | 9.357914218550          | 3.347713672313  | 1.490822777890 |
| H           | 9.774032063060          | 4.225094141658  | 0.987594381231 |
| H           | 8.677354438435          | 2.849339169320  | 0.790405243668 |
| H           | 10.185236089860         | 2.652165302816  | 1.682042525811 |
| C           | 9.850965190111          | 4.163511869967  | 4.407292560615 |
| H           | 10.463344342829         | 3.268575761491  | 4.574513002891 |
| H           | 9.444379130841          | 4.464298864881  | 5.378575060377 |
| H           | 10.522070890077         | 4.959140070659  | 4.071030588972 |
| C           | 7.832216820393          | 2.053834394542  | 3.709892060762 |
| H           | 8.685340680027          | 1.378093713812  | 3.855189483320 |



|    |                |                |                 |
|----|----------------|----------------|-----------------|
| H  | 7.183927395810 | 1.595187990945 | 2.956660167453  |
| H  | 7.279060143841 | 2.092246095970 | 4.652737997358  |
| C  | 3.695640195399 | 7.002171248687 | 1.295202325718  |
| H  | 2.836225447214 | 7.645776344111 | 1.064416389441  |
| H  | 4.144030693430 | 6.711932363658 | 0.337914503627  |
| H  | 4.416929993398 | 7.598417740506 | 1.856837194042  |
| C  | 1.814717004603 | 4.745597818703 | 1.055209207511  |
| H  | 1.143669725338 | 5.546750544898 | 0.717760196217  |
| H  | 1.187807275097 | 3.950853460561 | 1.469786017330  |
| H  | 2.312441271098 | 4.350962899058 | 0.161520453716  |
| C  | 2.051049590015 | 6.203196061326 | 3.742983082155  |
| H  | 2.411260287632 | 7.200569657533 | 4.010924615495  |
| H  | 2.110385237545 | 5.580463557794 | 4.640164872260  |
| H  | 0.991377957986 | 6.287725914386 | 3.471846410641  |
| C  | 3.116048771754 | 1.615367311469 | 1.633395038837  |
| H  | 4.033542818843 | 1.345343174598 | 1.098014278707  |
| H  | 2.459781871133 | 2.135493302859 | 0.931433019773  |
| H  | 2.622219297802 | 0.675753747165 | 1.913416808658  |
| C  | 1.858725506627 | 2.797678298580 | 4.169194682425  |
| H  | 1.379004171436 | 1.812462033708 | 4.233648739856  |
| H  | 1.144290451972 | 3.480516072705 | 3.702058891586  |
| H  | 2.023325992403 | 3.137225528730 | 5.197429481570  |
| C  | 4.455336558405 | 1.327371679404 | 4.275261064960  |
| H  | 4.835961092681 | 1.746192932584 | 5.209665314764  |
| H  | 5.293206401814 | 0.874798577660 | 3.738945883841  |
| H  | 3.760706816332 | 0.516372498436 | 4.531206477899  |
| C  | 5.687438449473 | 7.356754379995 | 6.923674964464  |
| Si | 5.121292530730 | 4.974823589382 | 8.377610014620  |
| Si | 2.675425437603 | 6.835265014175 | 9.444371568055  |
| Si | 2.275806275274 | 3.730259013808 | 9.294358522977  |
| Si | 7.729800238607 | 5.520891020864 | 10.156921661071 |
| Si | 7.288389965328 | 2.577192361986 | 9.208731099416  |
| N  | 5.677357891595 | 6.603424323101 | 7.941312183555  |
| H  | 6.141576077390 | 8.361577396830 | 7.054082037103  |
| C  | 4.878404711531 | 4.243339889294 | 6.658851879662  |
| H  | 3.861128411617 | 4.268378367477 | 6.250926729092  |
| C  | 3.585459120367 | 5.133125158157 | 9.516359619286  |
| C  | 4.285103329641 | 4.983946465722 | 10.912865163387 |
| H  | 4.712828719375 | 5.944779768215 | 11.218080617466 |
| C  | 3.571750702774 | 4.705759712402 | 11.699377264663 |
| H  | 5.419647233103 | 3.951171588735 | 10.846760023171 |
| H  | 4.969297596707 | 2.951861005457 | 10.757475548665 |
| H  | 5.973224200565 | 3.940206977279 | 11.796162007135 |
| C  | 6.377729216055 | 4.232834280189 | 9.628206212717  |
| C  | 3.725201069395 | 8.274455812151 | 10.090985773360 |
| H  | 3.112940417464 | 9.184533153296 | 10.039401116860 |
| H  | 4.626716093973 | 8.439689936319 | 9.495984898466  |
| H  | 4.023401991321 | 8.147899552728 | 11.137227902960 |
| C  | 1.151404487481 | 6.866942462980 | 10.579724176499 |
| H  | 1.418487529653 | 6.651902499775 | 11.621194091199 |
| H  | 0.353718928503 | 6.177538821405 | 10.287730505230 |
| H  | 0.729970548527 | 7.880427832648 | 10.558866352879 |
| C  | 2.303967375395 | 7.310159538914 | 7.697081165472  |
| H  | 2.084995486453 | 8.403662640327 | 7.610228589382  |
| H  | 1.094949541488 | 6.949958014741 | 7.474901381099  |
| H  | 2.764117731534 | 6.933225190621 | 6.909681373081  |
| C  | 1.422391601143 | 3.347625692692 | 10.946842386189 |
| H  | 1.006195523246 | 4.224990073004 | 11.450034152208 |
| H  | 2.102995600013 | 2.849340863354 | 11.647280842461 |
| H  | 0.595131937609 | 2.651995884368 | 10.755650419228 |
| C  | 0.929282561711 | 4.163283648065 | 8.030339835022  |
| H  | 0.316973384231 | 3.268294641363 | 7.863145501908  |
| H  | 1.335847773677 | 4.464070737003 | 7.059048501912  |
| H  | 0.258111433951 | 4.958870044419 | 8.366570851396  |
| C  | 2.948193799926 | 2.053786049455 | 8.727824967574  |
| H  | 2.095124005368 | 1.377973100634 | 8.582546879254  |
| H  | 3.596511125589 | 1.595221130676 | 9.481082520793  |
| H  | 3.501357294670 | 2.092203191275 | 7.784983219037  |
| C  | 7.084378498085 | 7.002544232811 | 11.142336804120 |
| H  | 7.943741576238 | 7.646228765759 | 11.373093323472 |
| H  | 6.636013659977 | 6.712309596031 | 12.099638055538 |
| H  | 6.363038644668 | 7.598709049342 | 10.580679358305 |
| C  | 8.965477042243 | 4.746122273384 | 11.382424998340 |
| H  | 9.636463105640 | 5.547337622631 | 11.719847488510 |
| H  | 9.592447597784 | 3.951409868109 | 10.967878916084 |
| H  | 8.467778328658 | 4.351482885600 | 12.276125766100 |
| C  | 8.729035289961 | 6.203593543003 | 8.694589555278  |
| H  | 8.368738426558 | 7.200921402222 | 8.426596830149  |
| H  | 8.669757804006 | 5.580811315399 | 7.797440026849  |
| H  | 9.788697337260 | 6.288229801053 | 8.965726299818  |
| C  | 7.664395478125 | 1.615780519643 | 10.804385113694 |
| H  | 6.746929868018 | 1.345754188161 | 11.339810811355 |
| H  | 8.320668137341 | 2.135963207554 | 11.506297720527 |
| H  | 8.158246204543 | 0.676169224590 | 10.524397588088 |

|   |                |                |                |
|---|----------------|----------------|----------------|
| C | 8.921622778885 | 2.798064732645 | 8.268528551349 |
| H | 9.401403974542 | 1.812875674721 | 8.204104527794 |
| H | 9.636019029460 | 3.480960266499 | 8.735639002331 |
| H | 8.756997689264 | 3.137568122055 | 7.240283382735 |
| C | 6.325135211798 | 1.327540459750 | 8.162543145807 |
| H | 5.944506943537 | 1.746253225666 | 7.228091620242 |
| H | 5.487282303227 | 0.874954391426 | 8.698873542824 |
| H | 7.019826599387 | 0.516566370905 | 7.906684867640 |

Sum of electronic and zero-point Energies= -4424.968388878233

**Table S2.** Atomic Coordinates of **2m**

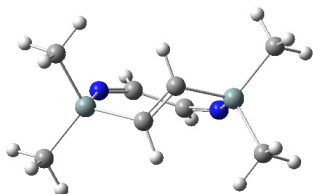

| Atomic Type | Coordinates (Angstroms) |                 |                 |
|-------------|-------------------------|-----------------|-----------------|
|             | X                       | Y               | Z               |
| Si          | -2.094435077618         | 0.366757862187  | 0.026641255838  |
| N           | -1.682532984297         | -1.304214066723 | -0.344053560858 |
| C           | -0.713057688390         | -2.114200147902 | -0.280663289770 |
| H           | -0.902090870942         | -3.146362940548 | -0.641776027041 |
| C           | -0.479066875836         | 1.183169890740  | 0.475871129062  |
| H           | -0.158845559842         | 1.149680671983  | 1.523794911378  |
| Si          | 2.094425741312          | 0.366755646021  | -0.026609854654 |
| N           | 1.682422012868          | -1.304214524883 | 0.343990229356  |
| C           | 0.712961985460          | -2.114211757956 | 0.280530393923  |
| H           | 0.902011201425          | -3.146404787645 | 0.641550736763  |
| C           | 0.479173734837          | 1.183600445586  | -0.475569880741 |
| H           | 0.159031941428          | 1.151266942448  | -1.523544936634 |
| C           | 3.325582972755          | 0.309903718268  | -1.445883737593 |
| H           | 3.696104623969          | 1.316801814627  | -1.672216163670 |
| H           | 4.184694017260          | -0.321014469582 | -1.194044840499 |
| H           | 2.869610309357          | -0.092655240107 | -2.357291286746 |
| C           | 2.867252917030          | 1.072278441208  | 1.533369461464  |
| H           | 3.728349855878          | 0.466962520457  | 1.836377049797  |
| H           | 3.211262846955          | 2.098671811887  | 1.360772830643  |
| H           | 2.163495006526          | 1.090889014079  | 2.372232909714  |
| C           | -3.325763174100         | 0.309950826649  | 1.445762236959  |
| H           | -3.696105839899         | 1.316880795241  | 1.672200751384  |
| H           | -4.184970351309         | -0.320753358129 | 1.193759591966  |
| H           | -2.869972889664         | -0.092815467554 | 2.357159101064  |
| C           | -2.866971297621         | 1.072506754079  | -1.533376736337 |
| H           | -3.728382142079         | 0.467566878403  | -1.836255315248 |
| H           | -3.210484453683         | 2.099090317144  | -1.360901476490 |
| H           | -2.163247047330         | 1.090652185928  | -2.372280810130 |

Sum of electronic and zero-point Energies= -1002.498978211107

**Table S3.** Atomic Coordinates of **2m'**

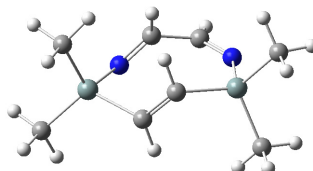

| Atomic Type | Coordinates (Angstroms) |                 |                 |
|-------------|-------------------------|-----------------|-----------------|
|             | X                       | Y               | Z               |
| Si          | 2.064111686065          | 0.386861510207  | -0.034398645058 |
| N           | 1.816594406412          | -1.345432812167 | 0.323640853912  |
| C           | 0.849887387680          | -2.163404098866 | 0.300555378988  |
| H           | 0.941372588038          | -3.165284700691 | 0.741575754134  |
| C           | 0.415993553064          | 1.116169134618  | -0.567563299226 |
| H           | 0.150479835477          | 0.917283055402  | -1.614177141636 |
| Si          | -2.195678169944         | 0.262694078725  | 0.001770553340  |
| N           | -1.408138182376         | -1.285933306769 | 0.462538155236  |
| C           | -0.456126059697         | -1.675749552678 | -0.282146687069 |
| H           | -0.345167832400         | -1.396106295814 | -1.349337948916 |

|                                            |                 |                 |                    |
|--------------------------------------------|-----------------|-----------------|--------------------|
| C                                          | -0.605180295897 | 1.235234393772  | 0.311278974247     |
| H                                          | -0.346168583565 | 1.374834289285  | 1.366925272528     |
| C                                          | -3.594725254699 | 0.609830992992  | 1.199384059839     |
| H                                          | -4.029351140979 | 1.601474897187  | 1.028767564944     |
| H                                          | -4.395404721751 | -0.131745647533 | 1.096741842621     |
| H                                          | -3.235250331865 | 0.568852830276  | 2.233227092559     |
| C                                          | -2.779919501896 | 0.342608040804  | -1.788988485413    |
| H                                          | -3.619296038205 | -0.343718214272 | -1.949569322154    |
| H                                          | -3.123776402618 | 1.354496192522  | -2.033802247793    |
| H                                          | -1.994313784123 | 0.079112095505  | -2.505526567966    |
| C                                          | 3.359425161441  | 0.455653001992  | -1.394731597783    |
| H                                          | 3.655653002501  | 1.493590762471  | -1.587127077487    |
| H                                          | 4.255326209779  | -0.108637201688 | -1.114520588569    |
| H                                          | 2.980085934472  | 0.037070242523  | -2.333813291702    |
| C                                          | 2.693007190289  | 1.122998253588  | 1.573767769323     |
| H                                          | 3.597483475018  | 0.600735577698  | 1.903466129795     |
| H                                          | 2.934465976777  | 2.184464140190  | 1.444696581305     |
| H                                          | 1.951568237917  | 1.040355757183  | 2.375683927797     |
| -----                                      |                 |                 |                    |
| Sum of electronic and zero-point Energies= |                 |                 | -1002.488957049272 |

**Table S4.** Atomic Coordinates of **5m**

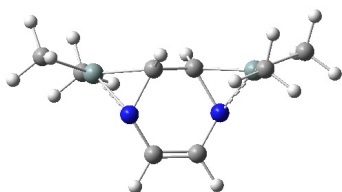

| -----                                      |                         |                  |                    |
|--------------------------------------------|-------------------------|------------------|--------------------|
| Atomic Type                                | Coordinates (Angstroms) |                  |                    |
|                                            | X                       | Y                | Z                  |
| -----                                      |                         |                  |                    |
| Si                                         | -2.347255787682         | 0.392588855298   | -0.022175015805    |
| N                                          | -1.285749126021         | -0.818380139361  | 0.622436638218     |
| C                                          | -0.627155867455         | -1.9910412223107 | 0.246939032444     |
| H                                          | -1.168650014538         | -2.916335248880  | 0.421239785838     |
| C                                          | -0.566535937900         | 0.493149204986   | 0.507491862148     |
| H                                          | -0.300586160512         | 0.892343491609   | 1.490369600299     |
| Si                                         | 2.347211537326          | 0.392623017390   | 0.022145262518     |
| N                                          | 1.285654346587          | -0.818358137068  | -0.622323994996    |
| C                                          | 0.627135640187          | -1.991021242323  | -0.246700448893    |
| H                                          | 1.168697707323          | -2.916301750471  | -0.420859001425    |
| C                                          | 0.566418772150          | 0.493206217978   | -0.507297465452    |
| H                                          | 0.300415443241          | 0.892379749075   | -1.490170297997    |
| C                                          | 3.773909423316          | 0.913220480135   | -1.077132629532    |
| H                                          | 4.097979132953          | 1.935044555039   | -0.847680540916    |
| H                                          | 4.638723646669          | 0.252125794359   | -0.944230587649    |
| C                                          | 3.473361829968          | 0.873218050313   | -2.128390209364    |
| H                                          | 2.750910988156          | 0.428471391404   | 1.856055408578     |
| H                                          | 3.599394674064          | -0.228762198097  | 2.080376375351     |
| H                                          | 3.017829412868          | 1.438516470868   | 2.188894894142     |
| H                                          | 1.895069129219          | 0.085303551753   | 2.445510377584     |
| C                                          | -3.774023466772         | 0.913484568619   | 1.076845065444     |
| H                                          | -4.097464807717         | 1.935563652617   | 0.847626004573     |
| H                                          | -4.639166496696         | 0.252913476281   | 0.943507394748     |
| H                                          | -3.473752424984         | 0.873016199381   | 2.128163438832     |
| C                                          | -2.750531233906         | 0.428201337813   | -1.856186202445    |
| H                                          | -3.599091260898         | -0.228906476174  | -2.080594263609    |
| H                                          | -3.017146016465         | 1.438212901080   | -2.189370994047    |
| H                                          | -1.894596376760         | 0.084683047871   | -2.445305243350    |
| -----                                      |                         |                  |                    |
| Sum of electronic and zero-point Energies= |                         |                  | -1002.467040533410 |

**Table S5.** Atomic Coordinates of **2c**

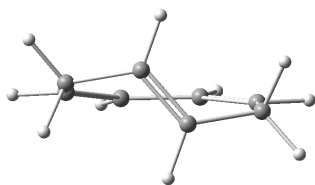

| -----       |                         |   |   |
|-------------|-------------------------|---|---|
| Atomic Type | Coordinates (Angstroms) |   |   |
|             | X                       | Y | Z |
| -----       |                         |   |   |

|   |                 |                 |                 |
|---|-----------------|-----------------|-----------------|
| C | -0.734931408145 | -1.501684530258 | 0.098290290287  |
| C | 0.736689973490  | -1.501062001310 | -0.098605949239 |
| H | -1.058980778489 | -2.533585172362 | 0.248405285458  |
| H | 1.061757733499  | -2.532637433948 | -0.248695423408 |
| C | 1.790405984482  | -0.650191100878 | -0.108797410692 |
| H | 2.761608271914  | -1.124401297705 | -0.268133416236 |
| C | 1.854678113219  | 0.851500159780  | 0.050011976731  |
| H | 2.637832191747  | 1.114809977411  | 0.774215366090  |
| H | 2.163065617714  | 1.292860450345  | -0.911143108807 |
| C | 0.491797422992  | 1.300715650025  | 0.448966617204  |
| H | 0.245428631773  | 1.253347480191  | 1.510977908456  |
| C | -1.789525191893 | -0.651888469466 | 0.108504275748  |
| H | -2.760176809626 | -1.127151556995 | 0.268014026926  |
| C | -0.493356374053 | 1.302301448590  | -0.448018196719 |
| H | -0.247084147225 | 1.259411076653  | -1.510253355303 |
| C | -1.855639790490 | 0.849865805128  | -0.050222204121 |
| H | -2.166366278111 | 1.290834510587  | 0.910344635455  |
| H | -2.638498126233 | 1.111787148034  | -0.775272652731 |

Sum of electronic and zero-point Energies= -310.505733005536

**Table S6.** Atomic Coordinates of **2c'**

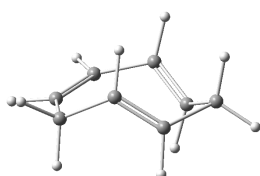

| Atomic Type | Coordinates (Angstroms) |                 |                 |
|-------------|-------------------------|-----------------|-----------------|
|             | X                       | Y               | Z               |
| C           | -1.435280010227         | 1.204398420632  | 0.003140264230  |
| C           | -0.033654968335         | 1.539644753741  | 0.326801861542  |
| H           | -2.204779208740         | 1.979405904022  | 0.029340006035  |
| H           | 0.173055129573          | 1.823261141800  | 1.362469263610  |
| C           | 0.955362866405          | 1.054463553185  | -0.447655911271 |
| H           | 0.688832211883          | 0.832192159552  | -1.482638179247 |
| C           | 2.100762049893          | 0.188702246250  | 0.067532501073  |
| H           | 3.036378882019          | 0.248220399294  | -0.496635300033 |
| H           | 2.295144162521          | 0.365448556200  | 1.130397730244  |
| C           | 1.302455162059          | -1.089750044827 | -0.191743622012 |
| H           | 1.340136940479          | -1.451171806825 | -1.221459466655 |
| C           | -1.865942785429         | -0.068777809480 | -0.181951792324 |
| H           | -2.943656373071         | -0.178360254036 | -0.319576755758 |
| C           | 0.184025944331          | -1.286123084316 | 0.524006233321  |
| H           | 0.152645864236          | -0.822286050595 | 1.512451693874  |
| C           | -1.172653372877         | -1.443429978635 | -0.092778294962 |
| H           | -1.109116711053         | -1.890680290479 | -1.094819054381 |
| H           | -1.846271554408         | -2.086330546019 | 0.492940111813  |

Sum of electronic and zero-point Energies= -310.460927237937

**Table S7.** Atomic Coordinates of **5c**

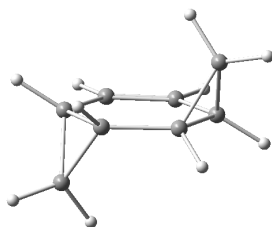

| Atomic Type | Coordinates (Angstroms) |                 |                 |
|-------------|-------------------------|-----------------|-----------------|
|             | X                       | Y               | Z               |
| C           | -0.619508309519         | 1.498974065861  | 0.252420919690  |
| C           | 0.619476645343          | 1.498634765402  | -0.252339215046 |
| H           | -1.125417697684         | 2.441171815675  | 0.456927236826  |
| H           | 1.126231797909          | 2.440554111852  | -0.456100072054 |
| C           | 1.366735123196          | 0.248437900459  | -0.544721261299 |
| H           | 2.026082135267          | 0.291535609689  | -1.409665433803 |
| C           | 1.842868592648          | -0.625218859982 | 0.602767345731  |

|   |                 |                 |                 |
|---|-----------------|-----------------|-----------------|
| H | 2.800775025335  | -1.130921101515 | 0.506289833423  |
| H | 1.606957159017  | -0.280629154471 | 1.606273435762  |
| C | 0.700585088087  | -1.074909455620 | -0.268133374099 |
| H | 0.922936878633  | -1.880722824398 | -0.967913997968 |
| C | -1.367616347975 | 0.248925231645  | 0.543731124040  |
| H | -2.028192116461 | 0.292605967203  | 1.407710473379  |
| C | -0.700650361693 | -1.074639014649 | 0.269607186263  |
| H | -0.923374533057 | -1.879799996911 | 0.970014768222  |
| C | -1.841999273732 | -0.626101995976 | -0.603280152340 |
| H | -1.604647528562 | -0.282690420104 | -1.606862463459 |
| H | -2.800055137748 | -1.131567986149 | -0.507299757307 |

Sum of electronic and zero-point Energies= -310.528414582582

**Table S8.** Atomic Coordinates of **5c'**

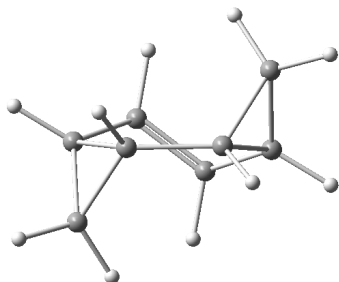

| Atomic Type | Coordinates (Angstroms) |                 |                 |
|-------------|-------------------------|-----------------|-----------------|
|             | X                       | Y               | Z               |
| C           | 0.375652388432          | -1.323872949129 | 0.567600331276  |
| C           | -0.377079143792         | -1.324371245955 | -0.567446739634 |
| H           | -0.153354882273         | -1.351613756270 | 1.523468717965  |
| H           | 0.150736890099          | -1.354685207375 | -1.523867065971 |
| C           | -1.458651365326         | -0.326050080102 | -0.568532102772 |
| H           | -2.158390857400         | -0.283005376969 | -1.402834435516 |
| C           | -1.829196477775         | 0.506618282639  | 0.637954297637  |
| H           | -2.793952956105         | 1.004281942076  | 0.578668925239  |
| H           | -1.585552661562         | 0.163391864697  | 1.637581762447  |
| C           | -0.720963431896         | 1.029536171977  | -0.234658786536 |
| H           | -0.962758159872         | 1.842225580749  | -0.917991646028 |
| C           | 1.458439612546          | -0.327048534828 | 0.568186836927  |
| H           | 2.157895804327          | -0.284679606397 | 1.402767795739  |
| C           | 0.721466206626          | 1.028717944442  | 0.234382266061  |
| H           | 0.963867755987          | 1.840670431438  | 0.918382091320  |
| C           | 1.830153034264          | 0.505997869514  | -0.637612882377 |
| H           | 1.588618313954          | 0.164341408509  | -1.638263682718 |
| H           | 2.795024181756          | 1.003269786768  | -0.576402921672 |

Sum of electronic and zero-point Energies= -310.437586077943

**Table S9.** Atomic Coordinates of **TS1**

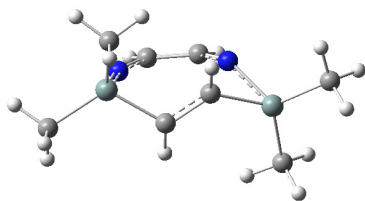

| Atomic Type | Coordinates (Angstroms) |                 |                 |
|-------------|-------------------------|-----------------|-----------------|
|             | X                       | Y               | Z               |
| Si          | 2.237976650163          | 0.326565532164  | -0.148905304395 |
| N           | 1.620032261669          | -1.171378050674 | 0.313930079143  |
| C           | 0.681254829148          | -2.023385440882 | 0.698312724290  |
| H           | 0.901677677066          | -3.093931353691 | 0.609099049908  |
| C           | 0.552454832815          | 0.396179098687  | -0.888203293491 |
| H           | 0.335352856086          | -0.276723804608 | -1.717557020208 |
| Si          | -2.336414600855         | 0.316113467766  | -0.178250049682 |
| N           | -1.179301604292         | -0.460260125800 | 0.873130377891  |
| C           | -0.645940555936         | -1.715421123801 | 0.936831276235  |
| H           | -1.359123690932         | -2.537405655816 | 0.969904657555  |
| C           | -0.518675686537         | 0.718461205727  | 0.022806906410  |
| H           | -0.304871902441         | 1.521965268979  | 0.730463658259  |

|   |                 |                 |                 |
|---|-----------------|-----------------|-----------------|
| C | -3.587819273748 | 1.417824853015  | 0.669054114319  |
| H | -3.935359584210 | 2.208705960887  | -0.005426280289 |
| H | -4.464598834138 | 0.844746123244  | 0.992761297601  |
| H | -3.142428311366 | 1.885792916016  | 1.552122035341  |
| C | -2.966724405592 | -0.570876232404 | -1.703884089656 |
| H | -3.795314882358 | -1.243378352421 | -1.452577176406 |
| H | -3.333174251380 | 0.141996535422  | -2.451525954711 |
| H | -2.171633077888 | -1.169583428698 | -2.159109611807 |
| C | 3.712178605882  | 0.228770294510  | -1.306655916638 |
| H | 3.988695809515  | 1.221129748315  | -1.683381545542 |
| H | 4.585896981773  | -0.186328816903 | -0.789669781637 |
| H | 3.493428338610  | -0.417560199888 | -2.162735193017 |
| C | 2.587770523696  | 1.582362555669  | 1.208799449801  |
| H | 3.493954567277  | 1.301542640872  | 1.759077075941  |
| H | 2.756195684124  | 2.580893349198  | 0.786047532856  |
| H | 1.768975236329  | 1.644288748843  | 1.932260359682  |

Sum of electronic and zero-point Energies= -1002.436612986770  
Imaginary Freq: -252.43410872

**Table S10.** Atomic Coordinates of TS2

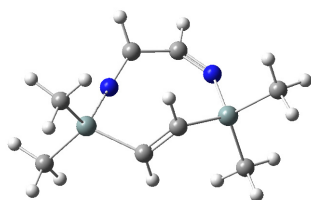

| Atomic Type | Coordinates (Angstroms) |                 |                 |
|-------------|-------------------------|-----------------|-----------------|
|             | X                       | Y               | Z               |
| Si          | 2.164268668403          | -0.288003437000 | -0.017405428477 |
| N           | 1.256762904134          | 1.155873210510  | 0.283064114333  |
| C           | 0.486198588527          | 2.061347568166  | -0.119053853135 |
| H           | 0.757678709720          | 2.784869664174  | -0.921707196245 |
| C           | 0.607738846030          | -1.340458790779 | 0.100775422288  |
| H           | 0.341487974684          | -1.647893992673 | 1.118498011263  |
| Si          | -2.018524144206         | -0.420292244031 | -0.052914190189 |
| N           | -1.828726800144         | 1.299828067903  | 0.331514306382  |
| C           | -0.951496057334         | 2.214796175839  | 0.328650687198  |
| H           | -1.263535126816         | 3.250240048284  | 0.557234126769  |
| C           | -0.405072438885         | -1.066477225031 | -0.750018087347 |
| H           | -0.133230737988         | -0.682182141766 | -1.742293683206 |
| C           | -3.425668892465         | -0.475137902527 | -1.299756612875 |
| H           | -3.676410337043         | -1.513689372982 | -1.547017580991 |
| H           | -4.323455557045         | 0.011648044415  | -0.904165233761 |
| H           | -3.153934821794         | 0.031977416813  | -2.232732524063 |
| C           | -2.495430723100         | -1.252268869616 | 1.562592844895  |
| H           | -3.420778236683         | -0.814100714028 | 1.951712417845  |
| H           | -2.663378753321         | -2.324759430305 | 1.409736371706  |
| H           | -1.723482697592         | -1.134380820476 | 2.329848941304  |
| C           | 3.369686822363          | -0.556773872740 | 1.394806992908  |
| H           | 3.874025541646          | -1.524685195061 | 1.292115813427  |
| H           | 4.140918017123          | 0.221563841384  | 1.414693000729  |
| H           | 2.853589016985          | -0.542594430301 | 2.360478571333  |
| C           | 3.034906146408          | -0.373809887565 | -1.685896574431 |
| H           | 3.793709603818          | 0.412525945353  | -1.773546583540 |
| H           | 3.536102704532          | -1.341491180073 | -1.810860308830 |
| H           | 2.332166809171          | -0.253439854318 | -2.517914668887 |

Sum of electronic and zero-point Energies= -1002.486726950811  
Imaginary Freq: -182.88276244

**Table S11.** Atomic Coordinates of TS3

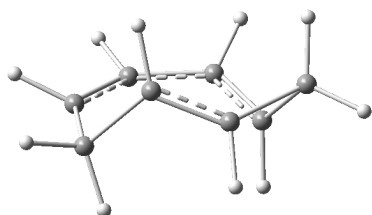

| Atomic Type                                | Coordinates (Angstroms) |                 |                   |
|--------------------------------------------|-------------------------|-----------------|-------------------|
|                                            | X                       | Y               | Z                 |
| C                                          | -0.975609563373         | 1.453729984067  | 0.105683928509    |
| C                                          | 0.411952488684          | 1.586617173671  | 0.038267283981    |
| H                                          | -1.502115124996         | 2.295926884199  | 0.558313391736    |
| H                                          | 0.853209944331          | 2.279137373647  | 0.757722412324    |
| C                                          | 1.239327984448          | 0.595465529430  | -0.538138687507   |
| H                                          | 1.187224628821          | 0.437761631234  | -1.611716015343   |
| C                                          | 2.110163400777          | -0.315795382320 | 0.262545033699    |
| H                                          | 3.050931044018          | -0.672431890572 | -0.159758993755   |
| H                                          | 2.196744171468          | -0.030307214345 | 1.311802465944    |
| C                                          | 0.885338959993          | -1.121085737977 | -0.092289105802   |
| H                                          | 0.940281226419          | -1.591853019537 | -1.073550016889   |
| C                                          | -1.781149276273         | 0.308733904714  | -0.002790968180   |
| H                                          | -2.729325124070         | 0.439788577032  | 0.521889954247    |
| C                                          | -0.343514693551         | -1.286088836373 | 0.545245192058    |
| H                                          | -0.484804179309         | -1.090487879206 | 1.605411613579    |
| C                                          | -1.532231662292         | -1.137077628157 | -0.354104871265   |
| H                                          | -1.272523221447         | -1.339132924146 | -1.398543672353   |
| H                                          | -2.409624759814         | -1.734516739269 | -0.087900045319   |
| Sum of electronic and zero-point Energies= |                         |                 | -310.443465166850 |

**Table S12.** Atomic Coordinates of TS4

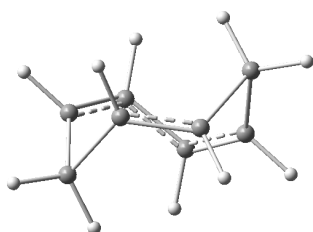

| Atomic Type                                | Coordinates (Angstroms) |                 |                   |
|--------------------------------------------|-------------------------|-----------------|-------------------|
|                                            | X                       | Y               | Z                 |
| C                                          | -0.449979930771         | -1.370537452750 | -0.533399252063   |
| C                                          | 0.450427102618          | -1.370075295161 | 0.533805732364    |
| H                                          | -0.067160022432         | -1.536436812575 | -1.543621146741   |
| H                                          | 0.067718552720          | -1.536722563967 | 1.543896884885    |
| C                                          | 1.512053114772          | -0.443801496910 | 0.462511279592    |
| H                                          | 2.173393170905          | -0.347600530820 | 1.322594044216    |
| C                                          | 1.776183405084          | 0.571532572843  | -0.617132919180   |
| H                                          | 2.765852178474          | 1.027450183924  | -0.593780839883   |
| H                                          | 1.467350261316          | 0.316674674229  | -1.629603033745   |
| C                                          | 0.681904458148          | 1.153113097716  | 0.224294667108    |
| H                                          | 0.926327611313          | 1.606768222417  | 1.180228979084    |
| C                                          | -1.512119500539         | -0.444267210753 | -0.462747210894   |
| H                                          | -2.173151779527         | -0.347968610197 | -1.323099203467   |
| C                                          | -0.681826209889         | 1.153328280154  | -0.223849800017   |
| H                                          | -0.925849232897         | 1.607618939730  | -1.179551388797   |
| C                                          | -1.776578658170         | 0.571462211931  | 0.616609008781    |
| H                                          | -1.469256331341         | 0.316521863770  | 1.629479763587    |
| H                                          | -2.765983840986         | 1.027937628754  | 0.592366398266    |
| Sum of electronic and zero-point Energies= |                         |                 | -310.427888816353 |

**Table S13.** Atomic Coordinates of 2S<sub>opt</sub>

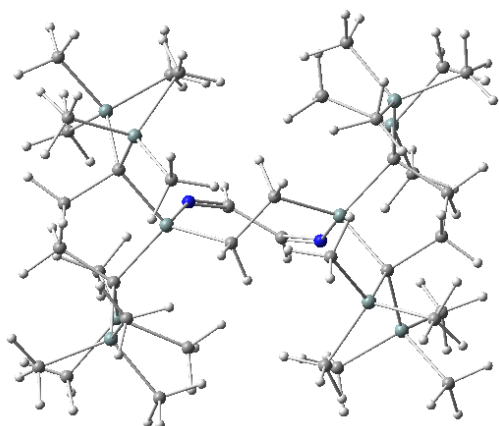

| Atomic Type | Coordinates (Angstroms) |                 |                 |
|-------------|-------------------------|-----------------|-----------------|
|             | X                       | Y               | Z               |
| Si          | -2.120961144368         | 0.096743428756  | -0.133420140720 |
| Si          | -3.567371622880         | -2.014864493025 | -2.139732584321 |
| Si          | -3.739827299273         | -2.554771174295 | 0.931033286525  |
| Si          | -3.332247547464         | 3.028190848416  | -0.624650208757 |
| Si          | -2.650898112401         | 2.303441869099  | 2.327850189372  |
| N           | -1.556413083366         | 0.633769451679  | -1.718021574750 |
| C           | -0.613195816047         | 0.446773124105  | -2.536650741216 |
| H           | -0.679332174252         | 0.946887640240  | -3.524498848693 |
| C           | -3.555472969144         | -1.166810007297 | -0.404257985397 |
| C           | -4.782026736754         | -0.195418776443 | -0.298493577453 |
| H           | -4.928601510005         | 0.324268413765  | -1.251093258795 |
| H           | -5.716764195300         | -0.736369931658 | -0.102501583081 |
| C           | -4.546628577459         | 0.857189210483  | 0.792807282859  |
| H           | -4.610235401063         | 0.359765716831  | 1.771111048802  |
| H           | -5.363969204409         | 1.591997288697  | 0.786022386021  |
| C           | -3.144059084542         | 1.550864288210  | 0.617323623021  |
| C           | -3.934413528224         | -0.816284136150 | -3.562596617687 |
| H           | -3.957697992226         | -1.401551628897 | -4.491430515332 |
| H           | -3.179298593604         | -0.035361052538 | -3.675700813835 |
| H           | -4.912313037210         | -0.332537044577 | -3.465257556326 |
| C           | -4.949149570477         | -3.308709866352 | -2.327692949694 |
| H           | -5.945258429014         | -2.868828820602 | -2.199751936051 |
| H           | -4.867649693263         | -4.164152925146 | -1.650697987336 |
| H           | -4.900272598072         | -3.698972353394 | -3.352780005707 |
| C           | -1.936700931808         | -2.899093162799 | -2.544558866329 |
| H           | -1.785581801098         | -2.903200629846 | -3.631281497709 |
| H           | -1.942915538194         | -3.942048433329 | -2.213248917297 |
| H           | -1.060314059123         | -2.423518971910 | -2.094540258829 |
| C           | -5.562563787410         | -3.068641717670 | 1.086073665384  |
| H           | -6.063948532951         | -3.254241255584 | 0.133129462689  |
| H           | -6.142851907484         | -2.313325177997 | 1.629285682097  |
| H           | -5.614163437148         | -3.994229139615 | 1.673874965113  |
| C           | -2.706430171554         | -4.097928883196 | 0.545627630165  |
| H           | -2.754605184789         | -4.769393137973 | 1.412119761436  |
| H           | -1.650317354814         | -3.861035817584 | 0.376701719621  |
| H           | -3.062040219836         | -4.660480513110 | -0.322869633187 |
| C           | -3.281088256748         | -2.131153763443 | 2.723490763653  |
| H           | -3.559421001773         | -2.998796698933 | 3.336504897843  |
| H           | -3.836151290994         | -1.272970817110 | 3.115103846726  |
| H           | -2.214058130634         | -1.954077765066 | 2.884433771335  |
| C           | -4.324578189842         | 2.655151085121  | -2.194276298200 |
| H           | -4.347558578156         | 3.574190622107  | -2.795209441097 |
| H           | -5.366067286002         | 2.384192396517  | -1.986135267300 |
| H           | -3.868723932990         | 1.870786375399  | -2.800853522163 |
| C           | -4.353936975063         | 4.443252840161  | 0.144462925182  |
| H           | -4.491271707421         | 5.204987331442  | -0.634602289723 |
| H           | -3.890438227774         | 4.938113200651  | 1.002902034314  |
| H           | -5.355843706027         | 4.114588317946  | 0.445237091526  |
| C           | -1.671006930101         | 3.768043331053  | -1.169991390621 |
| H           | -1.435584008944         | 3.457276183322  | -2.192192770169 |
| H           | -0.833620635722         | 3.467228234918  | -0.534294231309 |
| H           | -1.717771900152         | 4.863823779621  | -1.152344277652 |
| C           | -4.212176298132         | 2.895814976390  | 3.236371725290  |
| H           | -4.851322101831         | 2.051373472704  | 3.520305957487  |
| H           | -4.825932181522         | 3.601426879531  | 2.671139164257  |
| H           | -3.906780306491         | 3.393052196089  | 4.165961777911  |
| C           | -1.424927287201         | 3.748428771249  | 2.228095718566  |
| H           | -1.280576405281         | 4.140898404424  | 3.243040551953  |
| H           | -1.746302621836         | 4.580889716062  | 1.596484971877  |
| H           | -0.442506352477         | 3.419543331520  | 1.871247501689  |



|    |                 |                 |                 |
|----|-----------------|-----------------|-----------------|
| C  | -1.844962369999 | 1.133728874359  | 3.584492347579  |
| H  | -0.820575149996 | 0.859899911847  | 3.317823282209  |
| H  | -2.409606936260 | 0.216857133230  | 3.767257711344  |
| H  | -1.793397278129 | 1.676118490641  | 4.537846618789  |
| C  | 0.613468544675  | -0.445979924623 | -2.536779488866 |
| Si | 2.121048228324  | -0.096768093579 | -0.133370596839 |
| Si | 3.567726734655  | 2.014756575134  | -2.139529214422 |
| Si | 3.739651885696  | 2.554851699654  | 0.931133562671  |
| Si | 3.332246086462  | -3.028247864263 | -0.624643800500 |
| Si | 2.650640605296  | -2.303557147397 | 2.327848898411  |
| N  | 1.556607127378  | -0.633356997496 | -1.718146144323 |
| H  | 0.679675312691  | -0.945685971344 | -3.524831988841 |
| C  | 3.555602298530  | 1.166767634928  | -0.404025427909 |
| C  | 4.782176596641  | 0.195426170211  | -0.298015112989 |
| H  | 4.929095213720  | -0.324145522720 | -1.250627217602 |
| H  | 5.716820628180  | 0.736410896387  | -0.101672698936 |
| C  | 4.546555982909  | -0.857327343671 | 0.793110162837  |
| H  | 4.610052601276  | -0.360016660612 | 1.771480476324  |
| H  | 5.363887910232  | -1.592145872545 | 0.786334600680  |
| C  | 3.143986921484  | -1.550958535169 | 0.617370780503  |
| C  | 3.934938768937  | 0.816263761699  | -3.562420859473 |
| H  | 3.958641538757  | 1.401676273455  | -4.491152800912 |
| H  | 3.179640553738  | 0.035568194374  | -3.675858012030 |
| H  | 4.912679141840  | 0.332236138566  | -3.464886979177 |
| C  | 4.949527053042  | 3.308608228161  | -2.327342058589 |
| H  | 5.945633718103  | 2.868714576829  | -2.199415012189 |
| H  | 4.868022905366  | 4.163985608437  | -1.650279497511 |
| H  | 4.900671289913  | 3.698946810574  | -3.352395018082 |
| C  | 1.937008393212  | 2.898907254879  | -2.544495614058 |
| H  | 1.784837366381  | 2.901110984542  | -3.631066066754 |
| H  | 1.943947573800  | 3.942457374193  | -2.215029620072 |
| H  | 1.060849377339  | 2.424522385770  | -2.092773825913 |
| C  | 5.562344947719  | 3.068777590840  | 1.086517142731  |
| H  | 6.064028052785  | 3.254033091704  | 0.133666240059  |
| H  | 6.142446379193  | 2.313629896894  | 1.630158157926  |
| H  | 5.613793185481  | 3.994555403461  | 1.674026217185  |
| C  | 2.706216033825  | 4.097863068541  | 0.545245994815  |
| H  | 2.754326346299  | 4.769610625384  | 1.411516022792  |
| H  | 1.650127023129  | 3.860846630937  | 0.376372760949  |
| H  | 3.061780281550  | 4.660155933261  | -0.323434767314 |
| C  | 3.280644653669  | 2.131488106119  | 2.723583568691  |
| H  | 3.558758233332  | 2.999284254651  | 3.336480130806  |
| H  | 3.835833909052  | 1.273481749988  | 3.115413305717  |
| H  | 2.213629594771  | 1.954246360398  | 2.884439773623  |
| C  | 4.324684208322  | -2.655037263647 | -2.194156204198 |
| H  | 4.347659842336  | -3.573965668931 | -2.795256714328 |
| H  | 5.366166859486  | -2.384152513850 | -1.985882164458 |
| H  | 3.868887311084  | -1.870536663525 | -2.800592491008 |
| C  | 4.35383796508   | -4.443287841838 | 0.144566131258  |
| H  | 4.491441003412  | -5.204982259467 | -0.634488758458 |
| H  | 3.890114170140  | -4.938189074119 | 1.002856564025  |
| H  | 5.355625647126  | -4.114547184323 | 0.445630504210  |
| C  | 1.671040197483  | -3.768030407417 | -1.170162427438 |
| H  | 1.435300575273  | -3.456627680019 | -2.192095993056 |
| H  | 0.833720545557  | -3.467893931694 | -0.534057379520 |
| H  | 1.718100985983  | -4.863814314017 | -1.153288652025 |
| C  | 4.211742819388  | -2.896328221378 | 3.236430718785  |
| H  | 4.851259582634  | -2.052086595416 | 3.520111022548  |
| H  | 4.825172484620  | -3.602389934743 | 2.671408483998  |
| H  | 3.906157904135  | -3.393148431673 | 4.166183161007  |
| C  | 1.424373186232  | -3.748290325540 | 2.228057164621  |
| H  | 1.279728538813  | -4.140557119727 | 3.243038326653  |
| H  | 1.745722750188  | -4.580925799177 | 1.596662316185  |
| H  | 0.442098768786  | -3.419263232677 | 1.870941498479  |
| C  | 1.844983452535  | -1.133722348499 | 3.584582285736  |
| H  | 0.820595044475  | -0.859781860406 | 3.318082444985  |
| H  | 2.409757894974  | -0.216924164236 | 3.767255105781  |
| H  | 1.793503383252  | -1.676096397392 | 4.537941574630  |
| C  | -0.583396045871 | -0.514523147446 | 0.795959126345  |
| H  | -0.292030834717 | -1.450166795491 | 0.295046291630  |
| H  | -0.836043465742 | -0.803078439358 | 1.819688935770  |
| C  | 0.583456166954  | 0.514229573496  | 0.796129591431  |
| H  | 0.292044964903  | 1.450052332007  | 0.295584717301  |
| H  | 0.836107465126  | 0.802399047869  | 1.819960031923  |

-----  
Sum of electronic and zero-point Energies= -4426.190392566788

**Table S14.** Transition Energy, Wavelength, and Oscillator Strengths of the Electronic Transition of  $2_{opt}$ .

|                    |              |           |                    |              |           |
|--------------------|--------------|-----------|--------------------|--------------|-----------|
| Excited State 1:   | Singlet-A    | 2.2443 eV | Excited State 11:  | Singlet-A    | 4.6740 eV |
| 552.44 nm f=0.0005 | <S**2>=0.000 |           | 265.26 nm f=0.0006 | <S**2>=0.000 |           |
| 227 -> 228         | 0.70392      |           | 219 -> 228         | 0.40812      |           |
|                    |              |           | 221 -> 228         | 0.55424      |           |
|                    |              |           | 227 -> 230         | 0.10472      |           |
| Excited State 2:   | Singlet-A    | 3.5090 eV | Excited State 12:  | Singlet-A    | 4.6990 eV |
| 353.34 nm f=0.0029 | <S**2>=0.000 |           | 263.85 nm f=0.0090 | <S**2>=0.000 |           |
| 227 -> 229         | 0.69501      |           | 220 -> 228         | 0.69718      |           |
| Excited State 3:   | Singlet-A    | 3.8169 eV | Excited State 13:  | Singlet-A    | 5.0175 eV |
| 324.83 nm f=0.0014 | <S**2>=0.000 |           | 247.10 nm f=0.0104 | <S**2>=0.000 |           |
| 219 -> 228         | -0.37164     |           | 225 -> 229         | 0.67818      |           |
| 221 -> 228         | 0.14016      |           | Excited State 14:  | Singlet-A    | 5.0379 eV |
| 222 -> 228         | -0.26455     |           | 246.10 nm f=0.0026 | <S**2>=0.000 |           |
| 225 -> 228         | 0.29775      |           | 213 -> 228         | -0.13015     |           |
| 227 -> 230         | 0.39425      |           | 217 -> 228         | 0.54634      |           |
| 227 -> 231         | -0.11573     |           | 223 -> 229         | 0.33817      |           |
| Excited State 4:   | Singlet-A    | 3.8464 eV | 224 -> 229         | 0.21921      |           |
| 322.34 nm f=0.0022 | <S**2>=0.000 |           | Excited State 15:  | Singlet-A    | 5.0471 eV |
| 226 -> 228         | 0.70075      |           | 245.66 nm f=0.0304 | <S**2>=0.000 |           |
| Excited State 5:   | Singlet-A    | 4.2983 eV | 217 -> 228         | -0.39706     |           |
| 288.45 nm f=0.0024 | <S**2>=0.000 |           | 223 -> 229         | 0.48037      |           |
| 222 -> 228         | 0.11190      |           | 224 -> 229         | 0.27053      |           |
| 225 -> 228         | 0.58943      |           | 226 -> 229         | -0.12284     |           |
| 227 -> 230         | -0.35592     |           | Excited State 16:  | Singlet-A    | 5.0579 eV |
| Excited State 6:   | Singlet-A    | 4.3321 eV | 245.13 nm f=0.0002 | <S**2>=0.000 |           |
| 286.20 nm f=0.0575 | <S**2>=0.000 |           | 210 -> 228         | -0.11909     |           |
| 223 -> 228         | 0.56187      |           | 218 -> 228         | 0.68146      |           |
| 224 -> 228         | 0.40571      |           | Excited State 17:  | Singlet-A    | 5.1043 eV |
| Excited State 7:   | Singlet-A    | 4.3454 eV | 242.90 nm f=0.0096 | <S**2>=0.000 |           |
| 285.32 nm f=0.0110 | <S**2>=0.000 |           | 222 -> 229         | -0.22572     |           |
| 223 -> 228         | -0.41393     |           | 225 -> 229         | -0.11487     |           |
| 224 -> 228         | 0.56949      |           | 227 -> 230         | 0.14890      |           |
| Excited State 8:   | Singlet-A    | 4.3512 eV | 227 -> 231         | 0.53993      |           |
| 284.95 nm f=0.0040 | <S**2>=0.000 |           | 227 -> 234         | 0.29645      |           |
| 222 -> 228         | 0.58011      |           | Excited State 18:  | Singlet-A    | 5.1193 eV |
| 225 -> 228         | 0.12369      |           | 242.19 nm f=0.0034 | <S**2>=0.000 |           |
| 227 -> 230         | 0.35566      |           | 223 -> 229         | -0.36769     |           |
| Excited State 9:   | Singlet-A    | 4.5798 eV | 224 -> 229         | 0.59986      |           |
| 270.72 nm f=0.0057 | <S**2>=0.000 |           | Excited State 19:  | Singlet-A    | 5.1268 eV |
| 219 -> 228         | 0.41265      |           | 241.84 nm f=0.0003 | <S**2>=0.000 |           |
| 221 -> 228         | -0.40317     |           | 212 -> 228         | 0.27013      |           |
| 222 -> 228         | -0.27035     |           | 216 -> 228         | 0.50695      |           |
| 225 -> 228         | 0.19664      |           | 222 -> 229         | 0.36844      |           |
| 227 -> 230         | 0.20726      |           | Excited State 20:  | Singlet-A    | 5.1332 eV |
| Excited State 10:  | Singlet-A    | 4.6190 eV | 241.53 nm f=0.0000 | <S**2>=0.000 |           |
| 268.42 nm f=0.0641 | <S**2>=0.000 |           | 210 -> 228         | 0.16472      |           |
| 223 -> 229         | 0.10661      |           | 215 -> 228         | 0.31813      |           |
| 224 -> 229         | 0.10213      |           | 216 -> 228         | -0.31210     |           |
| 226 -> 229         | 0.65922      |           | 222 -> 229         | 0.44527      |           |
|                    |              |           | 227 -> 231         | 0.20153      |           |

**Table S15.** Transition Energy, Wavelength, and Oscillator Strengths of the Electronic Transition of **2S<sub>opt</sub>**.

|                    |              |           |                    |              |           |
|--------------------|--------------|-----------|--------------------|--------------|-----------|
| Excited State 1:   | Singlet-A    | 2.3942 eV | Excited State 11:  | Singlet-A    | 4.9697 eV |
| 517.86 nm f=0.0006 | <S**2>=0.000 |           | 249.48 nm f=0.0010 | <S**2>=0.000 |           |
| 228 -> 229         | 0.70114      |           | 216 -> 229         | 0.10999      |           |
|                    |              |           | 219 -> 229         | 0.68232      |           |
| Excited State 2:   | Singlet-A    | 3.6538 eV | Excited State 12:  | Singlet-A    | 5.0161 eV |
| 339.33 nm f=0.0010 | <S**2>=0.000 |           | 247.17 nm f=0.0032 | <S**2>=0.000 |           |
| 221 -> 229         | 0.18885      |           | 213 -> 229         | -0.13151     |           |
| 222 -> 229         | 0.33025      |           | 218 -> 229         | 0.68777      |           |
| 225 -> 229         | 0.30144      |           |                    |              |           |
| 227 -> 229         | 0.43129      |           | Excited State 13:  | Singlet-A    | 5.0607 eV |
| 228 -> 230         | 0.24122      |           | 244.99 nm f=0.0001 | <S**2>=0.000 |           |
| Excited State 3:   | Singlet-A    | 4.2586 eV | 214 -> 229         | 0.17103      |           |
| 291.14 nm f=0.0155 | <S**2>=0.000 |           | 217 -> 229         | 0.67174      |           |
| 223 -> 229         | 0.20382      |           | Excited State 14:  | Singlet-A    | 5.1083 eV |
| 224 -> 229         | 0.26260      |           | 242.71 nm f=0.0018 | <S**2>=0.000 |           |
| 226 -> 229         | 0.61885      |           | 211 -> 229         | 0.36756      |           |
| Excited State 4:   | Singlet-A    | 4.2611 eV | 216 -> 229         | 0.56967      |           |
| 290.97 nm f=0.0009 | <S**2>=0.000 |           | 219 -> 229         | -0.11542     |           |
| 225 -> 229         | 0.50533      |           | Excited State 15:  | Singlet-A    | 5.1760 eV |
| 227 -> 229         | -0.47661     |           | 239.54 nm f=0.0049 | <S**2>=0.000 |           |
| Excited State 5:   | Singlet-A    | 4.2780 eV | 208 -> 229         | -0.20538     |           |
| 289.82 nm f=0.0659 | <S**2>=0.000 |           | 212 -> 229         | 0.48603      |           |
| 223 -> 229         | 0.31893      |           | 213 -> 229         | 0.16865      |           |
| 224 -> 229         | 0.52713      |           | 215 -> 229         | 0.42467      |           |
| 226 -> 229         | -0.33430     |           | Excited State 16:  | Singlet-A    | 5.2256 eV |
| Excited State 6:   | Singlet-A    | 4.3524 eV | 237.26 nm f=0.0280 | <S**2>=0.000 |           |
| 284.86 nm f=0.0228 | <S**2>=0.000 |           | 212 -> 229         | -0.35097     |           |
| 223 -> 229         | 0.58509      |           | 213 -> 229         | -0.24368     |           |
| 224 -> 229         | -0.38503     |           | 215 -> 229         | 0.54461      |           |
| Excited State 7:   | Singlet-A    | 4.3912 eV | Excited State 17:  | Singlet-A    | 5.2450 eV |
| 282.35 nm f=0.0043 | <S**2>=0.000 |           | 236.39 nm f=0.0097 | <S**2>=0.000 |           |
| 222 -> 229         | 0.13873      |           | 228 -> 230         | 0.14319      |           |
| 225 -> 229         | -0.34470     |           | 228 -> 231         | 0.60746      |           |
| 227 -> 229         | -0.23378     |           | 228 -> 234         | 0.29366      |           |
| 228 -> 230         | 0.52602      |           | Excited State 18:  | Singlet-A    | 5.2577 eV |
| 228 -> 231         | -0.11852     |           | 235.81 nm f=0.0003 | <S**2>=0.000 |           |
| Excited State 8:   | Singlet-A    | 4.4785 eV | 211 -> 229         | 0.40021      |           |
| 276.84 nm f=0.0089 | <S**2>=0.000 |           | 214 -> 229         | 0.43622      |           |
| 221 -> 229         | 0.12111      |           | 216 -> 229         | -0.33636     |           |
| 222 -> 229         | 0.55478      |           | 217 -> 229         | -0.14675     |           |
| 225 -> 229         | -0.17464     |           | Excited State 19:  | Singlet-A    | 5.2984 eV |
| 227 -> 229         | -0.15904     |           | 234.00 nm f=0.0267 | <S**2>=0.000 |           |
| 228 -> 230         | -0.33507     |           | 210 -> 229         | 0.12975      |           |
| Excited State 9:   | Singlet-A    | 4.6330 eV | 212 -> 229         | -0.31470     |           |
| 267.61 nm f=0.0005 | <S**2>=0.000 |           | 213 -> 229         | 0.59761      |           |
| 221 -> 229         | 0.65643      |           | 218 -> 229         | 0.10760      |           |
| 222 -> 229         | -0.22623     |           | Excited State 20:  | Singlet-A    | 5.3188 eV |
| Excited State 10:  | Singlet-A    | 4.7064 eV | 233.11 nm f=0.0006 | <S**2>=0.000 |           |
| 263.44 nm f=0.0103 | <S**2>=0.000 |           | 211 -> 229         | -0.41847     |           |
| 220 -> 229         | 0.69731      |           | 214 -> 229         | 0.51836      |           |
|                    |              |           | 216 -> 229         | 0.19990      |           |

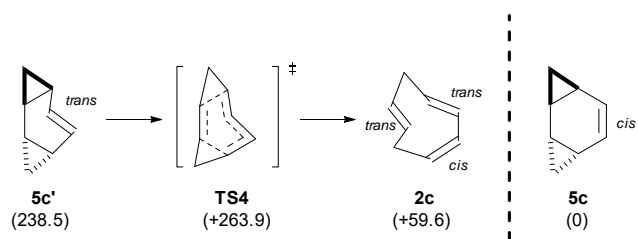

**Scheme S1.** Schematic energy diagrams of the reaction pathways from  $5c'$  to  $2c$ . Values in parentheses are relative energies ( $\text{kJ mol}^{-1}$ ) to  $5c$ .

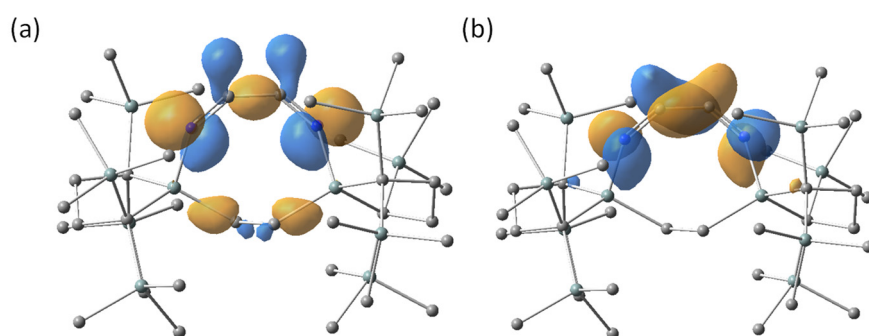

**Fig. S9** Frontier Kohn-Sham orbitals of  $2S_{opt}$  calculated at the B3PW91/6-311G(d,p) level of theory (isosurface value = 0.05). Hydrogen atoms are omitted for clarity. (a) HOMO (-5.89 eV), (b) LUMO (-2.21 eV).

#### 4. References

- S1. G. R. Fulmer, A. J. M. Miller, N. H. Sherden, H. E. Gottlieb, A. Nudelman, B. M. Stoltz, J. E. Bercaw and K. I. Goldberg, *Organometallics*, 2010, **29**, 2176.
- S2. M. Kira, S. Ishida, T. Iwamoto and C. Kabuto, *J. Am. Chem. Soc.*, 1999, **121**, 9722.
- S3. G. M. Sheldrick, SADABS, Empirical Absorption Correction Program; Göttingen, Germany, 1996.
- S4. G. M. Sheldrick, *Acta Crystallogr. Sect. A*, 2008, **A64**, 112.
- S5. Yadokari-XG 2009, Release of Software for Crystal Structure Analyses, C. Kabuto, S. Akine, T. Nemoto and E. Kwon, *J. Cryst. Soc. Jpn.* 2009, **51**, 218.
- S6. Gaussian 09, Revision D.01, M. J. Frisch, G. W. Trucks, H. B. Schlegel, G. E. Scuseria, M. A. Robb, J. R. Cheeseman, G. Scalmani, V. Barone, B. Mennucci, G. A. Petersson, H. Nakatsuji, M. Caricato, X. Li, H. P. Hratchian, A. F. Izmaylov, J. Bloino, G. Zheng, J. L. Sonnenberg, M. Hada, M. Ehara, K. Toyota, R. Fukuda, J. Hasegawa, M. Ishida, T. Nakajima, Y. Honda, O. Kitao, H. Nakai, T. Vreven, J. A. Montgomery, Jr., J. E. Peralta, F. Ogliaro, M. Bearpark, J. J. Heyd, E. Brothers, K. N. Kudin, V. N. Staroverov, T. Keith, R. Kobayashi, J. Normand, K. Raghavachari, A. Rendell, J. C. Burant, S. S. Iyengar, J. Tomasi, M. Cossi, N. Rega, J. M. Millam, M. Klene, J. E. Knox, J. B. Cross, V. Bakken, C. Adamo, J. Jaramillo, R. Gomperts, R. E. Stratmann, O. Yazyev, A. J. Austin, R. Cammi, C. Pomelli, J. W. Ochterski, R. L. Martin, K. Morokuma, V. G. Zakrzewski, G. A. Voth, P. Salvador, J. J. Dannenberg, S. Dapprich, A. D. Daniels, O. Farkas, J. B. Foresman, J. V. Ortiz, J. Cioslowski, and D. J. Fox, Gaussian, Inc., Wallingford CT, 2013.
- S7. GRRM 14: S. Maeda, Y. Harabuchi, Y. Osada, T. Taketsugu, K. Morokuma and K. Ohno, see <http://grm.chem.tohoku.ac.jp/GRRM/>; (a) S. Maeda, K. Ohno and K. Morokuma, *J. Chem. Theory Comput.*, 2009, **5**, 2734; (b) S. Maeda, E. Abe, M. Hatanaka, T. Taketsugu and K. Morokuma, *J. Chem. Theory Comput.*, 2012, **8**, 5058; (c) S. Maeda, K. Ohno and K. Morokuma, *Phys. Chem. Chem. Phys.*, 2013, **15**, 3683.
